# Supplementary material
Source: PubMed Central journal article supplement (PMC1976220)

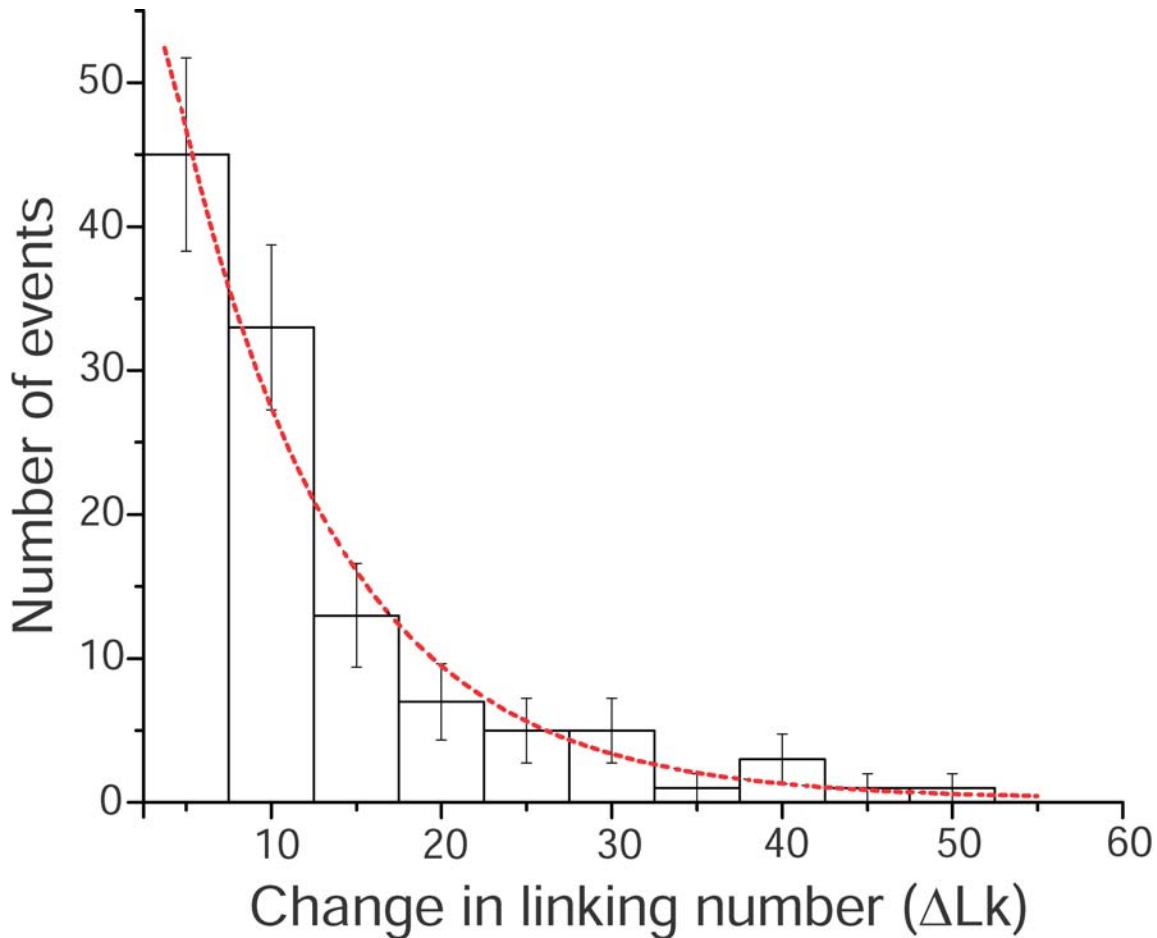

Supplement: pnas_0701989104_1.pdf [file pnas_0701989104_1.pdf]

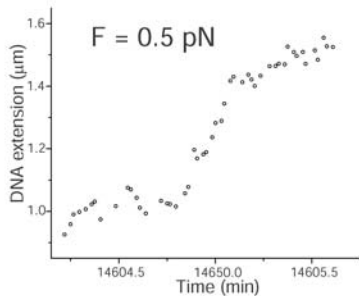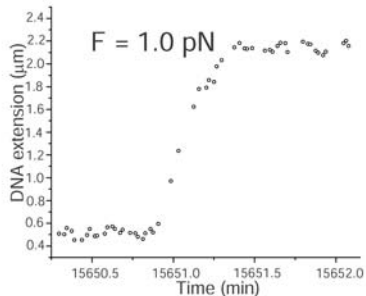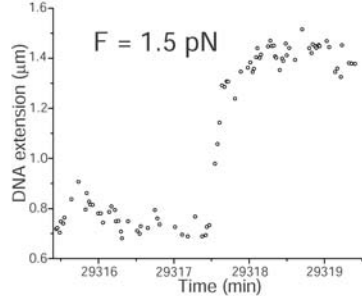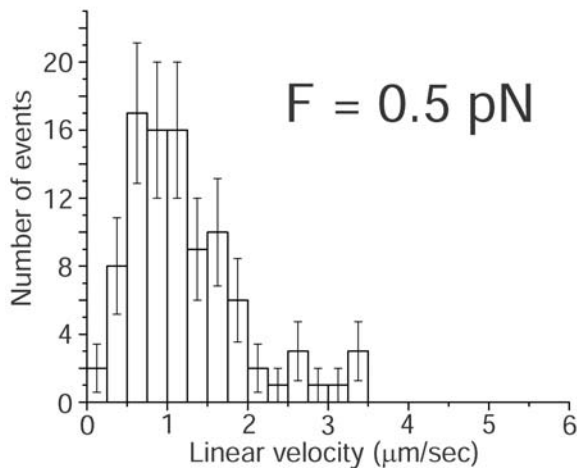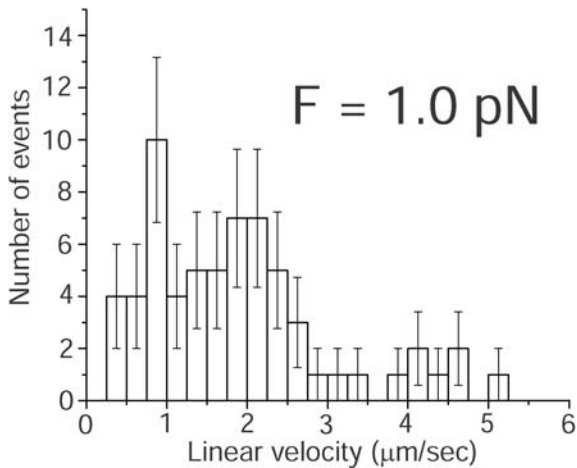

Supplement: pnas_0701989104_2.pdf [file pnas_0701989104_2.pdf]
